# Transcriptome Sequencing, and Rapid Development and Application of SNP Markers for the Legume Pod Borer *Maruca vitrata* (Lepidoptera: Crambidae)

Venu M. Margam<sup>1</sup>, Brad S. Coates<sup>2</sup>, Darrell O. Bayles<sup>2</sup>, Richard L. Hellmich<sup>2</sup>, Tolulope Agunbiade<sup>3</sup>, Manfredo J. Seufferheld<sup>4</sup>, Weilin Sun<sup>3</sup>, Jeremy A. Kroemer<sup>2</sup>, Malick N. Ba<sup>5</sup>, Clementine L. Binso-Dabire<sup>5</sup>, Ibrahim Baoua<sup>6</sup>, Mohammad F. Ishiyaku<sup>7</sup>, Fernando G. Covas<sup>8</sup>, Ramasamy Srinivasan<sup>9</sup>, Joel Armstrong<sup>10</sup>, Larry L. Murdock<sup>1</sup>, Barry R. Pittendrigh<sup>3\*</sup>

**1** Department of Entomology, Purdue University, West Lafayette, Indiana, United States of America, **2** United States Department of Agriculture – Agricultural Research Service, Corn Insect and Crop Genetics Research Unit, Genetics Laboratory, Iowa State University, Ames, Iowa, United States of America, **3** Department of Entomology, University of Illinois at Urbana-Champaign, Champaign, Illinois, United States of America, **4** Department of Crop Sciences, University of Illinois at Urbana-Champaign, Champaign, Illinois, United States of America, **5** Institut de l'Environnement et de Recherches Agricoles (INERA), Station de Kamboinsé, Ouagadougou, Burkina Faso, **6** Institut National de Recherche Agronomique du Niger, Maradi, Niger, **7** Department of Plant Science, Institute for Agricultural Research, Ahmadu Bello University, Zaria, Nigeria, **8** University of Puerto Rico, Mayaguez, Puerto Rico, **9** AVRDC-The World Vegetable Center, Tainan, Taiwan, **10** Ecosystem Sciences, The Commonwealth Scientific and Industrial Research Organization, Black Mountain, Australian Capital Territory, Australia

## Abstract

The legume pod borer, *Maruca vitrata* (Lepidoptera: Crambidae), is an insect pest species of crops grown by subsistence farmers in tropical regions of Africa. We present the *de novo* assembly of 3729 contigs from 454- and Sanger-derived sequencing reads for midgut, salivary, and whole adult tissues of this non-model species. Functional annotation predicted that 1320 *M. vitrata* protein coding genes are present, of which 631 have orthologs within the *Bombyx mori* gene model. A homology-based analysis assigned *M. vitrata* genes into a group of paralogs, but these were subsequently partitioned into putative orthologs following phylogenetic analyses. Following sequence quality filtering, a total of 1542 putative single nucleotide polymorphisms (SNPs) were predicted within *M. vitrata* contig assemblies. Seventy one of 1078 designed molecular genetic markers were used to screen *M. vitrata* samples from five collection sites in West Africa. Population substructure may be present with significant implications in the insect resistance management recommendations pertaining to the release of biological control agents or transgenic cowpea that express *Bacillus thuringiensis* crystal toxins. Mutation data derived from transcriptome sequencing is an expeditious and economical source for genetic markers that allow evaluation of ecological differentiation.

**Citation:** Margam VM, Coates BS, Bayles DO, Hellmich RL, Agunbiade T, et al. (2011) Transcriptome Sequencing, and Rapid Development and Application of SNP Markers for the Legume Pod Borer *Maruca vitrata* (Lepidoptera: Crambidae). PLoS ONE 6(7): e21388. doi:10.1371/journal.pone.0021388

**Editor:** David Liberles, University of Wyoming, United States of America

**Received:** February 15, 2011; **Accepted:** May 26, 2011; **Published:** July 6, 2011

This is an open-access article, free of all copyright, and may be freely reproduced, distributed, transmitted, modified, built upon, or otherwise used by anyone for any lawful purpose. The work is made available under the Creative Commons CC0 public domain dedication.

**Funding:** This research has been made possible through support provided to the Dry Grains Pulses Collaborative Research Support Program (CRSP) by the Bureau for Economic Growth, Agriculture, and Trade, U.S. Agency for International Development, under the terms of Grant No. EDH-A-00-07-00005. The opinions expressed herein are those of the authors and do not necessarily reflect the views of the U.S. Agency for International Development or the U.S. government. The funders had no role in study design, data collection and analysis, decision to publish, or preparation of the manuscript.

**Competing Interests:** The authors have declared that no competing interests exist.

\* E-mail: pittendr@illinois.edu

## Introduction

The legume pod borer (LPB), *Maruca vitrata* (Lepidoptera: Crambidae) occurs throughout tropical and subtropical regions of the world. The larvae feed upon flowers and pods of more than 39 host plants mainly from the Family Fabaceae (leguminous plants) [1,2,3]. Host plants include the cultivated *Vigna unguiculata* subsp. *unguiculata* (cowpea), *Vigna unguiculata* subsp. *sesquipedalis* (yard-long bean), *V. radiata* (mung bean), *Glycine max* (soybean), *Pueraria phaseoloids* (puero), *Phaseolus lunatus* (lima bean), and *Cajanus cajan* (pigeonpea), as well as many wild species. Larvae feed on flowers, pods and peduncles [1]. This can lead to 20–80% yield losses in sub-Saharan Africa [2,3], Southeast Asia [4,5,6], South Asia [7,8,9], and Central and South America. The control of *M. vitrata* damage to crops largely relies upon the timely application and

availability of chemical insecticides [10], but their effectiveness is hindered by the tight larval webbing that reduces pesticide exposure [3]. Furthermore, the cost of insecticides is prohibitive to most subsistence farmers in developing nations [11,12,13]. The losses and subsequent control challenges posed by *M. vitrata* have led to the emergence of this species as a major threat to economic and humanitarian well-being in developing and under-developed nations. Over the past several decades significant advances have been made in the understanding of the life-history and distribution patterns of *M. vitrata*, but extensive genomic- and population-level data are still lacking.

Expressed sequence tags (ESTs) are collections of short sequence reads from cDNA templates and are representative of a suite of genes expressed in particular tissues, developmental stages, phenotypes, or treatment conditions [14,15,16]. EST datasets are

often generated as entry points to genomic research that is aimed at solving agricultural problems [17], and such data have mainly been obtained for digestive tissues of crop pest species [18,19,20]. “Next Generation” sequencing (NGS) technologies are based on micro-scale pyrosequencing reactions [21,22] carried out in parallel on a PicoTiterPlate™ [23] or flow cell [24]. These advances have resulted in the high throughput and low cost acquisition of EST reads from understudied species [25]. Functional annotation of EST-derived gene sequences is dependent upon their assignment to biochemical pathways using homology-based predictions with those of evolutionarily proximal model organisms. This approach has identified target molecules of biological insecticides in crop pest species [18,20]. Members of the midgut-expressed carboxylesterase, glutathione S-transferase, and cytochrome P450 monooxygenase gene families are known to be involved in the detoxification of chemical insecticides (xenobiotics), and have been identified from lepidopteran EST resources [26]. Similarly, adaptation of insects to the host plant defenses often results from successful modulation of digestive enzymes and the ability to neutralize toxic defensive substances [27]. These features influence the ability of larvae to utilize a given plant as a food source. Additionally, cells in the midgut modulate peritrophic membrane permeability through the action of chitin synthases, chitinases, and associated matrix proteins, which have been implicated as factors affecting pathogen entry [28].

Since EST sequences are obtained at random from a library, homologous gene regions often are re-sampled and can be assembled into contiguous sequences (contigs) that are representative of genes [29] and alleles at specific loci [30]. Single nucleotide polymorphisms (SNPs) are point mutations that occur among alleles at a locus, and can be readily identified computationally from contig assemblies [31,32,33]. SNPs tend to be biallelic mutations and are represented at high density within genomes [34]. SNPs can be developed into molecular genetic markers that incur low cost and with minimal error during high throughput genotyping screens [35,36]. Variation at putative SNP loci can rapidly be developed into molecular genetic markers, and applied to population genetic inference [37], and genome mapping [38]. SNP-based genetic markers show a low incidence of non-PCR amplifying “null” alleles and a high rate of successful marker development in Lepidoptera [18]. This contrasts with reports of microsatellite-based markers that tend to be problematical when used to genotype natural populations due to associations with repetitive DNA elements [39,40,41]. Microsatellites have also been shown to hitchhike within actively mobile transposons [42,43,44], or to be target sites for the integration of *Helitron*-like transposons [45]. This may justify avoiding the use of microsatellite markers for genotyping Lepidopteran species [43].

In the present paper we describe the 454-based pyrosequencing (i.e. Roche GS-FLX) of larval *M. vitrata* midgut and salivary gland transcripts. Functional annotation of these EST assemblies dramatically increases the genomic information for this non-model species, and has the potential to contribute to knowledge of larval gut physiology. Additionally, we demonstrate that EST assemblies are a source of mutation information from which high throughput SNP-based molecular genetic markers can readily be developed to assess population genetic structure and gene flow.

## Materials and Methods

### 454-based sequencing of larval midgut and salivary gland cDNA

Premolt 3<sup>rd</sup>, 4<sup>th</sup> and 5<sup>th</sup> instar *M. vitrata* larvae were collected in *RNAlater* (Ambion Inc.) in 2008 from: (i) *Sesbania cannabina* plants at the World Vegetable Center, Tainan County, southern Taiwan (ii)

a laboratory colony raised at the Commonwealth Scientific and Industrial Research Organization, Canberra, Australia, and (iii) common bean *Phaseolus vulgaris* plants at Lares, Puerto Rico. Twenty larvae from each collection site were immersed in ice-cold phosphate buffered saline (PBS; 137 mM NaCl, 2.7 mM KCl, 4.3 mM Na<sub>2</sub>HPO<sub>4</sub>×7H<sub>2</sub>O, 1.4 mM KH<sub>2</sub>PO<sub>4</sub>, pH 7.4) (with 10% *RNAlater* solution) for 20 min, then salivary gland and midgut tissues were dissected, pooled, and placed in 500 µL ice-cold PBS. Dissected tissues were centrifuged at 800× g for 5 min and washed 3 times with ice-cold 1× PBS. Total RNA was extracted from these tissues using a TRIzol® Reagent (Invitrogen, Carlsbad, CA) according to the manufacturer’s instructions. RNA was quantified on a NanoDrop 2000 (Thermo Scientific, Wilmington, DE). First-strand cDNA was synthesized from 1 µg of total RNA using a BD Smart PCR cDNA synthesis kit (BD Biosciences, San Jose, CA). The cDNA was then amplified using a BD mix (BD Biosciences, San Jose, CA) for 15 cycles following the manufacturer’s protocol except that a modified CDS II/3’ primer 5’ – TAG AGG CCG AGG CGG CCG ACA TGT TTT GTT TTT TTT TCT TTT TTT TTT VN -3’ (IDT Inc.) was used to avoid long homopolymer repeats. Subsequent to first-strand synthesis, the cDNA was then amplified using PCR Advantage II polymerase (Clontech Inc.) with the following thermal cycling program: (i) 1 min at 95°C, (ii) 21 cycles of 95°C for 7 sec, and (iii) 21 cycles of 68°C for 6 min. A 2 µL aliquot of the PCR product was analyzed on a 1% agarose gel to determine the amplification efficiency. The PCR product was then subjected to SfiI digestion (10 units) for 2 h at 50°C to remove the concatemers formed by CDSIII/3’ and the SMART IV primers. A Qiaquick PCR purification kit (Qiagen, Valencia, CA) was used to remove the leftover primers and nucleotides from the amplified cDNA. The quality and quantity of the cDNA library was evaluated by both spectrophotometry and gel electrophoresis.

Sequencing and assembly: Amplified cDNA was submitted to the Keck Genomic Center (University of Illinois at Urbana Champaign) for library construction and sequencing. Two µg of amplified cDNA was used for library construction followed by pyro-sequencing on a Roche 454 GS-FLX (Roche, Basel, Switzerland) using established protocols [23]. The adaptor sequences were identified and the trim positions were changed in .sff files using the Cross-match (<http://www.phrap.org>), sff tools from Roche (<https://www.rocheapplied-science.com>) and custom-built Java scripts. Sequences shorter than 50 nucleotides or containing homopolymers (in which 60% over the entire length of the read is represented by one nucleotide) were not included for assembly. Raw sequence data were obtained from .sff files, and assembled into contigs using the Roche GS *De Novo* Assembler (i.e., Newbler assembler) using default parameters (Seed step: 12, Seed length: 16, Min overlap length: 40, Min overlap identity: 90%, Alignment identity score: 2, and Alignment difference score: -3), and all of the non-redundant contigs were exported to a file in FASTA format.

### Sanger-based sequencing of whole adult cDNA

Two adult *M. vitrata* moths were collected in *RNAlater* in 2006 from a light trap at Samaru-Zaria, Nigeria. Total RNA from these adults was extracted using TRIzol® Reagent (Invitrogen) according to the manufacturer’s instructions. RNA was quantified on a NanoDrop 2000 (Thermo Scientific). First strand cDNA synthesis was created using 1 µg of total RNA with a BD Smart PCR cDNA synthesis kit (BD Biosciences, San Jose, CA). The cDNA was then amplified by a BD mix for 15 cycles (BD Biosciences, San Jose, CA). The amplified cDNA was then polished with T4 DNA polymerase following a Proteinase K treatment. The resulting amplified cDNA was purified by a Qiaquick PCR Purification Kit (Qiagen, Valencia, CA). The amplified cDNA was normalized

using a Trimmer Kit (Evrogen, Moscow, Russia). The normalization utilizes duplex-specific nuclease (DSN) digestion to remove abundant transcripts. Briefly, the cDNA was denatured and subsequently allowed to reassociate. The hybridization kinetics leads to equalization of the single-stranded cDNA fraction. Addition of DSN was used to remove double-stranded cDNA formed by abundant transcripts. The normalized cDNA was then amplified using an Advantage 2 Polymerase with modified primers containing a *Not* I adapter site and then checked for quality. Following digestion by the *Not* I restriction enzyme and purification, the normalized cDNA was ligated into the *Not* I site in pBluescript II SK+ vector. The ligated cDNA was transformed to MAX Efficiency<sup>®</sup> DH5<sup>™</sup> Competent Cells. The library titer was determined from an aliquot of transformation reaction without culture amplification. Sequencing reactions and fragment analyses on an ABI 3730XL sequencer was conducted by the Purdue University Genomics Core Facility, West Lafayette, IN. The Purdue Core Facility also performed vector sequence trimming, as well as PHRED quality parameter assessment and trimming which was  $q < 30$  (99% base call accuracy).

### Homology searches and functional gene annotation

The Newbler assembler was used to create a reference assembly of all EST data (combined set of 454- and Sanger-derived sequences), and this *M. vitrata* EST dataset was imported into the Blast2Go suite [46,47]. Homology searches were carried out by query of the NCBI non-restricted protein database using the blastx algorithm ([48];  $E\text{-value} \leq 1 \times 10^{-6}$  and  $Hsp \geq 33$  cutoffs). Prediction of putative genes, and annotation based on biological process (P), molecular functions (F), and cellular component (C) was accomplished by search of the Gene Ontology (GO) database (The Gene Ontology Consortium; <http://www.geneontology.org/>) using top-blastx descriptors output from Blast2go ( $E\text{-value-Hit-Filter} \leq 10^{-5}$ ; Annotation Cutoff = 55; GO Weight = 5; Hsp-Hit Coverage Cutoff = 0), and subsequent retrieval of Enzyme Code (EC) designations directly from the GO website. Final sequence annotation steps used search of the inclusive InterPro databases (<http://www.ebi.ac.uk/interpro/>) using the InterProScan (IPS) tool [49,50]. Biochemical pathway information was collected by downloading relevant maps from the Kyoto Encyclopedia of Genes and Genomes (KEGG; <http://www.genome.jp/kegg/>; [51]) using EC terms. Resulting biological process (P), molecular functions (F), and cellular component (C) at GO level 2 were reported, as were statistics on (i) distribution of sequence lengths, (ii)  $E\text{-values}$ , (iii) percent sequence similarity, and (iv) species from which blast hits were derived.

The derived (translated) protein products from gene model v. 2.3 of the model lepidopteran species *B. mori* in the file `silkworm_glean_pep.fa.tar.gz` from <http://www.silkbdb.org/silkbdb/doc/download.html> were downloaded. These sequences represented all predicted genes from the whole genome assembly of *B. mori*. This GLEAN-predicted protein sequence data was imported into a local database using the program BioEdit [52], queried with *M. vitrata* ESTs using the tblastx algorithm, and the results were filtered for  $E\text{-values} \leq 1 \times 10^{-40}$ . Due to the presence of paralogs or conserved protein domains within eukaryotic organisms, an individual *M. vitrata* EST resulted in  $>1$  putative ortholog within the *B. mori* gene model. Protein coding frames were predicted for *M. vitrata* ESTs that were assigned the functional annotation as a putative membrane alanine aminopeptidase (APN) coding sequence using the program Virtual Ribosome (<http://www.cbs.dtu.dk/services/VirtualRibosome/>; [53]). FASTA formatted *M. vitrata* APNs were individually aligned against the nine predicted APNs within the *B. mori* GLEAN proteins (BGIBMGA001641, BGIBMGA001642,

BGIBMGA008017, BGIBMGA008018, BGIBMGA008059 to BGIBMGA008063; Supplemental Data S3) using the ClustalW algorithm with default parameters (gap opening penalty 15, gap extension penalty 6.66, weight matrix IUB, and transition weight of 0.5). Derived full-length APN sequences were retrieved from the NCBI nr protein database (downloaded Oct 25, 2010 using keyword search “Lepidoptera” and “aminopeptidase N”), and aligned with the 9 GLEAN-predicted *B. mori* APNs with the ClustalW algorithm as described previously. APN alignments were imported into the MEGA 5.0 software package [54], and hierarchical relationships among APN paralogs (gene family members) were inferred using the Neighbor-Joining method [55] from the Poisson-corrected per site amino acid substitution model [56]. The NJ reconstruction method incorporated 1000 bootstrap pseudoreplicates to determine the number of possible trees supporting each node [57], and each reported as a strict consensus tree. Additionally, a Maximum Likelihood (ML) based model was also used to infer the phylogenetic relationship among lepidopteran aminopeptidases using MEGA 5.0 using the Jones-Taylor-Thornton (JTT) model of amino acids substitution from partial deleted site data (95% cutoff). The gamma distribution was estimated from empirical data, a heuristic tree search performed using the Close-Neighbor-Interchange (CNI) method, and branch support at each node estimated using 10000 bootstrap pseudoreplications and results reported as a strict consensus tree.

### Single nucleotide polymorphism (SNP) prediction and assay development

By design, the *de novo* assembler collapses the SNPs at a position into a single base call (the most commonly found base at that position, i.e. majority rule nucleotide calls). High confidence nucleotide differences, including but not limited to SNPs, were detected with the Roche GS Reference Mapper by mapping the sequencing reads to the corresponding *M. vitrata* reference assembly (section 2.2). The high confidence differences were saved to a flat file specifying full descriptions for the detected variants and treating each read as a separate read rather than grouping them into duplicates for variation detection. A custom script was used to parse a high confidence difference file that was output into both FASTA and tabular formats for all the SNPs that met quality criteria. These filtered SNPs were required to have at least 150 bp of flanking sequence on both sides of the SNP to support requirements for assay development. Molecular assays were developed to detect putative SNP variation identified within the combined *M. vitrata* EST assembly using a Sequenom MassARRAY<sup>®</sup> Designer software (Sequenom, San Diego, CA), and unmodified oligonucleotides were synthesized by Integrated DNA Technologies (Coralville, IA). Each SNP detection assay consists of an initial multiplex PCR step that amplifies genome regions containing mutations, followed by a single base extension reaction that incorporates mass-modified dideoxynucleotides complementary to the allele at each polymorphic locus using the iPLEX-Gold mastermix (Sequenom; [58]). Each multiplex PCR reaction typically can be designed to co-amplify up to 35 loci.

### SNP genotyping and population genetic analyses

*Maruca vitrata* samples were collected from sites in Burkina Faso, Niger, and Nigeria Africa from 2005 to 2007 (Fig. 1). DNA was extracted using Qiagen DNeasy Blood and Tissue Kit (Qiagen, Valencia, CA), and quantified on a Nanodrop 2000 (Thermo Scientific). Each SNP genotyping assay was performed on a Sequenom MassARRAY<sup>®</sup>, and consisted of an initial PCR step that amplified the genome region that contains an individual SNP, followed by a single base extension reaction that incorporated

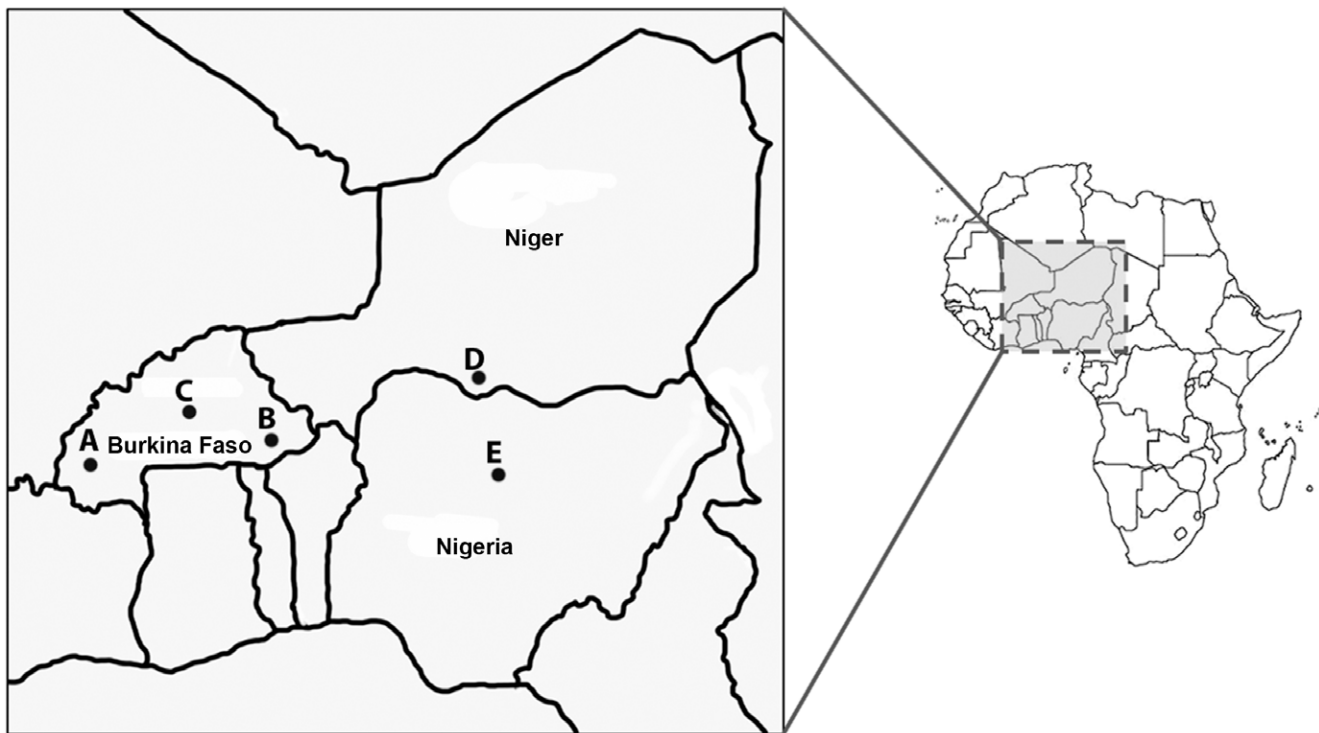

**Figure 1. The location of collection sites for *Maruca vitrata* population samples.**  
doi:10.1371/journal.pone.0021388.g001

mass-modified dideoxynucleotides that are complementary to the polymorphic locus within each allele included in the iPLEX-Gold mastermix (Sequenom, San Diego, CA; Tang *et al.* 2004). Allele discrimination and subsequent genotyping was accomplished by Matrix-assisted laser desorption/ionization-time of flight (MALDI-TOF) mass spectrometry [59] on a Sequenom MassARRAY® located at the Iowa State Center for Plant Genomics (Ames, IA).

Exact tests for sample differentiation among pairwise  $F_{ST}$  estimates, and locus-by-locus  $F_{ST}$ ,  $F_{IS}$ , and  $F_{IT}$  estimates for all populations were performed with Arlequin (v. 3.1; [60]; see references therein for all tests). Hierarchical population structure was assessed by an analysis of molecular variance (AMOVA) test using global genotypes and  $F_{ST}$  estimates as an average across all loci [61,62,63] for two assumed geographic partitions of *M. vitrata* collected from cowpea plants in eastern (Maradi, Niger, and Samaru, Zaria, Nigeria) and western regions (Station Agricole du Farakob, Fada N'gourma, and Kamboinsé sites in Burkina Faso; Fig. 1). Subsequent tests of hierarchical structure used all possible groupings of the population samples to investigate the range of  $F_{ST}$  values. An isolation-by-distance model was tested by the relationship between  $F_{ST}/(1-F_{ST})$  employing SNP-based  $F_{ST}$  estimates and geographic distance between sample sites ( $\log_{10}$  km) using the IBD web service v.3.15 (<http://ibdws.sdsu.edu/~ibdws/>; [64]), and significance was estimated by 1000 jackknifed permutation steps.

STRUCTURE 2.3.2.1 [65] was used to estimate the number of distinct populations ( $K$ ). Runs were carried out for each value of  $K$  from 1 to 10. Each run consisted of  $9 \times 10^6$  iterations, preceded by a burn-in of  $10^5$  iterations that used an admixture model of individual ancestry. The median value of the estimated log probability of the data, conditional on  $K$ , ( $\ln \Pr(X|K)$ ), was used to compute the posterior probability of  $K$ ,  $\Pr(K|X)$ , assuming a uniform prior distribution for  $K$ . STRUCTURE 2.3.2.1 was also used to estimate

the number of distinct populations ( $K$ ;  $K_{max} = 10$ ) given the *a priori* information of  $K = 5$  (LOCPRIOR command; [66]), with all other parameters identical as in the 1st run except for the location information was included in a separate LocData column.

## Results

### *Maruca vitrata* expressed sequence tags and sequence assembly

The 454-based sequencing of the larval *M. vitrata* midgut and salivary gland library on a 1/2 gasketed plate resulted in a total of 88,841 reads, of which 12.8 Mb from 38,001 high quality reads were aligned using the Newbler Assembler. This assembly of digestive tissue-derived ESTs encompassed 3499 contigs with a mean of  $452.9 \pm 279.9$  bases, and contained a maximum contig length of 3299 bases (Table 1). Read data from the 454 sequencing run was submitted to the National Center for Biotechnology Information (NCBI) Short Read Archive (SRA), and can be retrieved as accession SRA020876.1. Additionally, assembled contig sequences are provided as online supporting information. A total of 2229 reads were obtained from Sanger sequencing of the *M. vitrata* whole adult cDNA library. These reads encompassed 1.3 Mb of sequencing data following trimming of vector and low-quality sequence. The processed read data was submitted to the NCBI EST database (dbEST) under accessions HS097571–HS099476. Assembly of the raw Sanger read data resulted in 2229 unique sequences that comprised of 1892 contigs and 337 singletons with a mean length of  $561.4 \pm 300.5$  bp (maximum 1812 bp; Table 1). The combined assembly of 454- and Sanger-based EST contig sequences (i.e. the Reference Assembly) resulted in 3729 contig sequences with a mean length of  $459.6 \pm 287.3$  bp (maximum 3299 bp), of which 430 sequences were not shared between libraries. This reference assembly was used for all

**Table 1.** Summary of *Maruca vitrata* expressed sequence tag (EST) data and assemblies.

|                              | Sanger library | 454 GS                  | Reference (combined) |
|------------------------------|----------------|-------------------------|----------------------|
| Tissue                       | Whole adult    | Salivary gland & midgut | -                    |
| Number of raw reads          | 2229           | 88,841                  | -                    |
| Number of raw bases          | 1,251,439      | 29,630,098              | -                    |
| Number of reads assembled    | 2229           | 38,001                  | 40,230               |
| Number of bases assembled    | 1,251,439      | 12,767,552              | 14,018,991           |
| Number of assembled contigs  | 1892           | 3499                    | 3729                 |
| Mean contig length (bp)      | 561.4±300.5    | 452.9±279.9             | 459.6±287.3          |
| Range of contig lengths (bp) | 41–1812        | 92–3299                 | 96–3299              |

doi:10.1371/journal.pone.0021388.t001

subsequent functional gene annotation and single nucleotide polymorphism (SNP) predictions.

### Homology, orthology, and functional gene annotation

Search of the NCBI non-restricted protein database using 3729 unique *M. vitrata* sequences from the reference assembly (combined assembly of 454- and Sanger-derived sequence data) as queries using the blastx algorithm resulted in 1320 sequences (39.4%) with “hits” having an  $E$ -value  $\leq 9.0 \times 10^{-7}$  and similarity  $\geq 36.67\%$  (mean =  $75.8 \pm 13.7\%$ ; Fig. 2A). The greatest individual species representation among results of the blastx homology search was from the model insect species *B. mori* (25.46%) and *Tribolium castaneum* (8.66%; Fig. 2B). *Manduca sexta* (Lepidoptera: Sphingidae) comprised 3.57% of the hits, and other species of Lepidoptera accounted for 14.82%. Additionally, 4.7% of sequences showed homology to the endocellular microsporidial parasite *Nosema ceranae* (Fig. 2B), and following reference back to the source 454- and Sanger-based EST libraries indicated that microsporidial contamination came from the larval midgut and salivary gland sequences. A search of the NCBI dbEST resource using the blastx algorithm resulted in predictions of homology for 2358 *M. vitrata* sequences (63.2%) to previously obtained ESTs. These “hits” to dbEST accessions in the “est\_others” database showed  $E$ -values  $\leq 9.0 \times 10^{-7}$  and sequence similarities  $\geq 36.67\%$  (mean =  $75.8 \pm 13.7\%$ ), and a corresponding species distribution that was highly representative of lepidopteran ESTs sequences including the model species *B. mori* (Fig. 2C).

Results from querying a local database comprised of the GLEAN predicted protein sequences from the *B. mori* gene model v. 2.3 using the tblastx algorithm provided putative ortholog assignments for 631 *M. vitrata* EST-derived contig sequences

( $E$ -values  $\leq 3.0 \times 10^{-41}$ ; similarities  $\geq 26.1\%$ ; Supplementary Data S1), which also resulted in homology matches of *M. vitrata* ESTs to  $\geq 1$  gene sequence in the *B. mori* gene ( $2.04 \pm 3.59$  ortholog matches per *M. vitrata* EST). The blastx results indicated for the ortholog matches were confounded by the presence of closely related gene family members, such that definitive orthologous gene relationships could not depend solely upon homology estimates. Protein coding frames were predicted for *M. vitrata* ESTs with functional annotation of putative membrane alanine aminopeptidase (APN) encoding genes using the program Virtual Ribosome (<http://www.cbs.dtu.dk/services/VirtualRibosome/>; [53]; Supplementary Data S2), which were subsequently aligned against 9 predicted APNs within the *B. mori* GLEAN proteins (BGIBMGA001641, BGIBMGA001642, BGIBMGA008017, BGIBMGA008018, BGIBMGA008059 to BGIBMGA008063; Supplemental Data S3). Phylogenetic reconstruction of the aminopeptidase N gene family from Lepidoptera using NJ and Maximum Likelihood methods both resulted in 9 distinct groups (APN1 to APN9; Fig. 3) and showed congruence in tree topology between methods. The APN clades defined solely by BGIBMGA001641, BGIBMGA001642, BGIBMGA008018, and BGIBMGA008061 were monophyletic, whereas BGIBMGA008059 (APN1), BGIBMGA008017 (APN2), BGIBMGA008063 (APN3), BGIBMGA008060 (APN4), and BGIBMGA008062 (APN5) encompassed all midgut-expressed orthologs previously identified from other species of Lepidoptera.

A total of 3676 gene ontology (GO) annotations were obtained for *M. vitrata* EST sequences ( $5.50 \pm 1.83$  GO annotations per sequence). At level 2, the distribution of GO terms among biological process (P), cellular component (C), and molecular function (F) showed metabolic process, cellular component, and

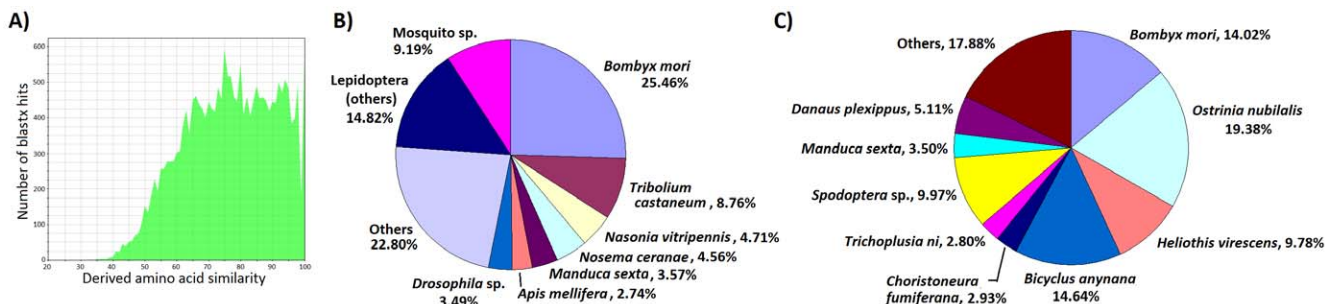

**Figure 2.** The distribution of sequence similarity values (A) and species distribution (B) among the top blastx “hits” resulting from queries of the NCBI non-restricted protein database with *M. vitrata* ESTs. The distribution of species among top blastx “hits” to the NCBI expressed sequence tag (EST) database, dbEST (C).

doi:10.1371/journal.pone.0021388.g002

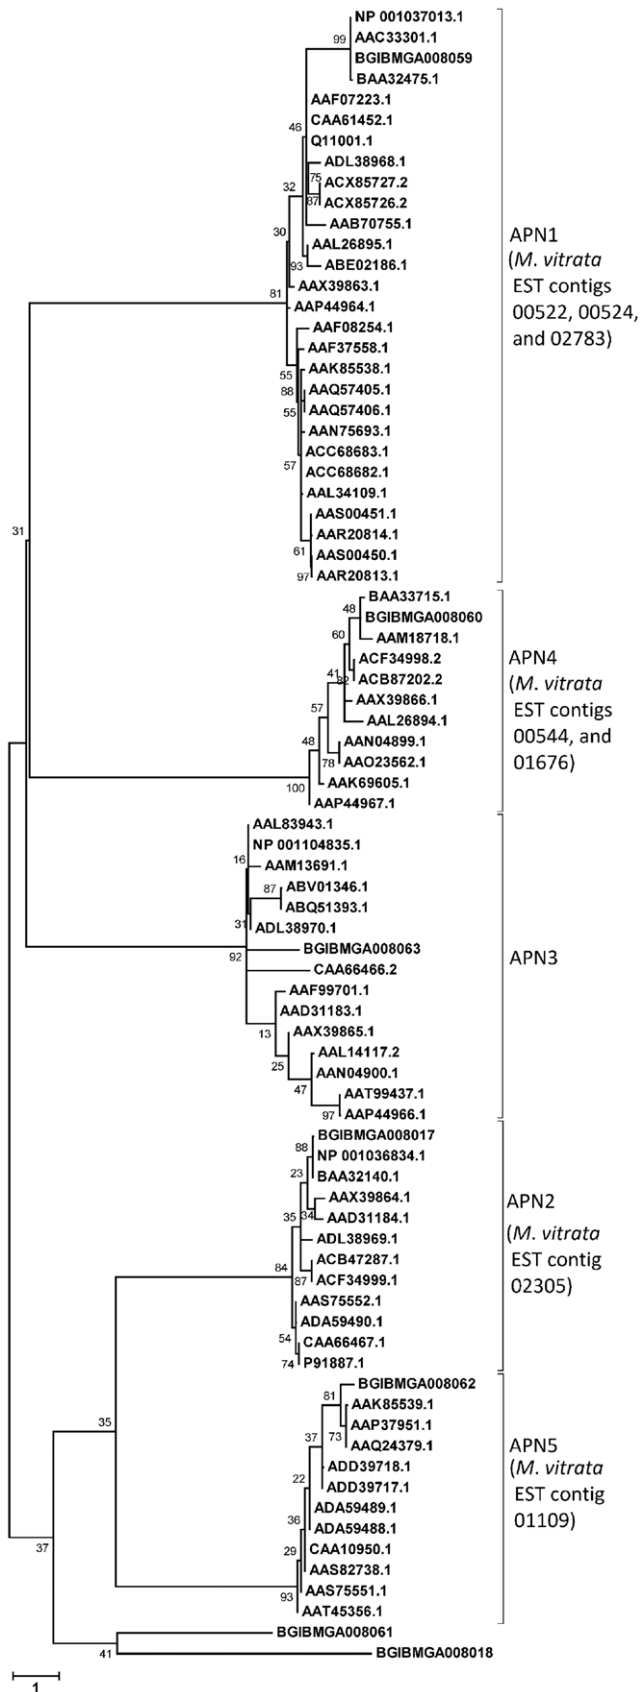

**Figure 3. Phylogenetic relationship among aminopeptidase N (APN) proteins encoded by members of nine gene families in Lepidoptera.** Clustering was used to assign gene orthology to derived

APN peptide sequences sampled with the *Maruca vitrata* reference EST assembly. Predicted coding frame, derived peptide sequence, and multiple sequence alignments with the *Bombyx mori* GLEAN proteins sequences are shown in Supplementary Data S3. doi:10.1371/journal.pone.0021388.g003

catalytic activity respectively to be at the highest frequency (Fig. 4A to 4C). A total of 543 unique InterPro annotations were made for *M. vitrata* EST data, and the 15 most frequent InterPro entries encountered are listed in Table 2. Roles in catalytic function among predicted genes within the annotated ESTs at GO level F (molecular function) and metabolic process (GO level P; biological process) was corroborated by the observation of 36 serine protease (IPR009003, IPR001254, and IPR018114), esterase (IPR002018), and hydrolase activities (IPR017853 and IPR013781; Table 2). GO terms for cellular component (C) show that structural cellular component proteins are highly represented, including insect cuticle protein coding genes, are highly represented (InterPro accession IPR000618; Table 1). Full annotation information for *M. vitrata* ESTs from Sanger reads and the reference assembly are available at LepDB.org (Coates *et al.* unpublished).

### Single nucleotide polymorphism (SNP) prediction and assay development

The Newbler Assembler generated a *de novo* reference assembly of *O. nubilalis* midgut and antennal EST reads that contained 3729 contigs (i.e., combined assembly of 454- and Sanger-based EST contig sequences; mean length  $459.6 \pm 287.3$  bp). Polymorphism among constituent reads within each contig was used to predict 2620 putative SNPs using the Newbler Mapping suite. Quality score criteria and proximity to 5' and 3' ends of respective contigs resulted in the removal of 1542 of 2620 putative SNPs (58.9%) from the pool of candidate loci, and the 1078 remaining loci were used for SNP marker development. Single base extension-based PCR assays were designed using the Sequenom MassARRAY Designer Software to detect 139 of the remaining 1078 predicted SNP loci (12.9%). The 139 SNP assays were also designed to co-amplify within 4 separate PCR multiplex reactions (multiplexes W1 to W4;  $31.25 \pm 5.68$  markers per multiplex).

Within the present study, 70 SNP loci from multiplex PCR reactions W1 and W2 (markers MvSMA-0001 to -0070; Supplementary Data S4) were used to genotype 375 of 383 DNA samples (97.9%) extracted from *M. vitrata* that were collected from 5 locations in Africa (Fig. 1). Genotyping results showed that 29 of 70 markers (41.4%) failed to produce a signal in >75% of individuals from population samples when separated on the Sequenom MassARRAY®, and 6 of 70 markers showed no polymorphism among samples (8.6% = SNP false discovery rate). In total, 35 of 70 SNP loci (50.0%) resulted in polymorphic genetic markers that were scored from Sequenom MassARRAY® output and further analyzed for population genetic parameters.

### SNP genotyping and population genetic analyses

In total, output from the Sequenom MassARRAY® contained 20,836 of 22,302 possible genotypes (6.6% failure rate). Permutation tests show that 17 of the 35 SNP marker loci that were polymorphic within the African samples (48.6%), and also showed heterozygosity levels that do not significantly deviate from that expected under Hardy-Weinberg Equilibrium (HWE) in any population ( $P \geq 0.05$ ; Supplementary Data S5). A total of 11 loci, MARVI- Contig1478\_266, -Contig1663\_832, -Contig172\_349, -Contig172\_430, -Contig180\_816, -Contig315\_310, -Contig355\_182, -Contig702\_243, -Contig896\_1927, -Contig98\_663, and -Contig1692\_590, were polymorphic in  $\geq 5$  of 6 populations

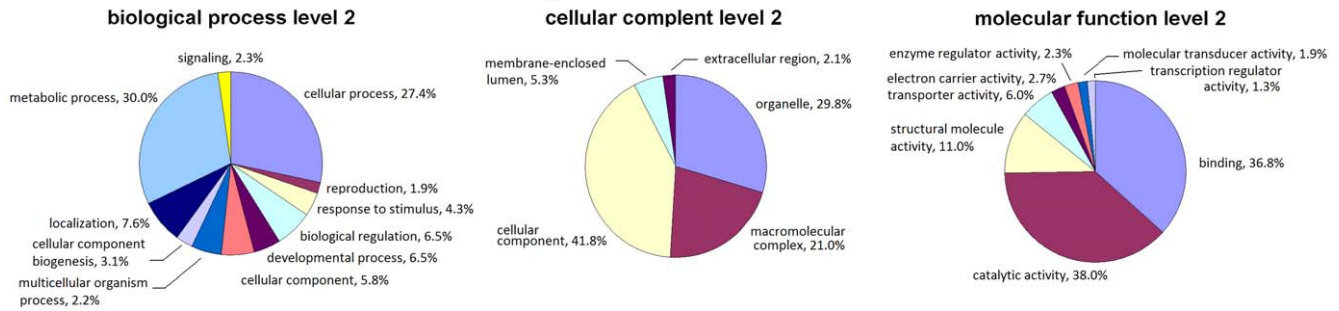

**Figure 4. Gene ontologies ascribed to *Maruca vitrata* EST top blast hit terms by the Gene Ontology (GO) database.** Assignments for biological process (P), cellular complement (C), and molecular function (F) are shown at GO level 2 (Note: a given EST sequence may be assigned >1 GO term).

doi:10.1371/journal.pone.0021388.g004

wherein a total of 22 alleles were scored among 166 individuals. SNP minor allele frequencies (MAFs) ranged from 0.294 (marker MARVI-Contig180\_816) to 0.053 (marker MARVI-Contig315\_310) across all populations and all loci (mean = 0.141 ± 0.092; Table 3). Inbreeding coefficient ( $F_{IS}$ ) and  $F_{IT}$  estimates across all populations and all loci ranged from -0.007 to 0.085 and -0.034 to 0.086, respectively. The global estimates of  $F_{IS}$  and  $F_{IT}$  averaged across loci also were not significant ( $P \geq 0.05$ ; Table 3).

The locus-by-locus  $F_{ST}$  estimates for the 11 *M. vitrata* SNP markers ranged from -0.024 to 0.164 among subpopulations and showed a global estimate of 0.021 ± 0.060 (Table 3). The pairwise  $F_{ST}$  estimates calculated between sample sites ranged from -0.0192 to 0.0524, and were significant only for four comparisons: 1) between Station Agricole du Farakoba, Burkina Faso and Maradi, Niger; 2) between Station Agricole du Farakoba, Burkina Faso and Samaru, Zaria, Nigeria; 3) Fada N’gourma, Burkina Faso and Maradi, Niger; and 4) Kamboninse, Burkina Faso and Samaru, Zaria, Nigeria ( $P \leq 0.0451$ ). No comparisons surpassed a Bonferonni adjusted significance threshold of 0.005 ( $\alpha = 0.05 \div 10$ ;

Table 4). Regression of  $\text{Log}_{10}(F_{ST})$  and  $\text{Log}_{10}(\text{geographic distance, km})$  values showed a correlation between the two parameters ( $r = 0.740$ ;  $Z = 129.5$ ; Fig. 5), but Mantel Tests for significance did not reject the null hypothesis ( $P\text{-value} = 0.1000$ ). Exact tests of sample differentiation based on genotype frequencies from a non-differentiation exact  $P\text{-value} = 0.12276$  indicated that no significant pairwise comparisons were present among the five *M. vitrata* sample sites in Africa (Fig. 1;  $P\text{-values} \geq 0.1461$ ; data not shown).

Tests of hierarchical population structure conducted using AMOVA and  $F$ -statistics. An assumed structure comprised on an eastern (Maradi, Niger, and Samaru, Zaria, Nigeria) and a western group (Station Agricole du Farakoba, Fada N’gourma, and Kamboinse sites in Burkina Faso; Fig. 1) resulted in an estimated  $F_{ST} = 0.040$  ( $P = 0.112$ ) and 4.0% of total genetic variation accounted for by differences between groups when calculated using the percentage of pairwise differences between genotypes. The same method of estimation also indicated an  $F_{IS} = -0.018$  ( $P < 0.651$ ) and  $F_{IT} = 0.017$  ( $P < 0.576$ ). Analogously, when calculated as a weighted average across all 11 loci, the *M. vitrata* from the eastern and western sample sites showed an  $F_{ST}$  estimate of 0.046 ( $P < 0.002$ ) and 4.63% of total genetic variation due to differences among groups, and the corresponding values of  $F_{IS} = 0.110$  ( $P < 0.049$ ) and  $F_{IT} = 0.172$  ( $P < 0.021$ ) and 82.8% of total genetic variation within populations was estimated to be partitioned within individuals. No other hierarchical tests, using random grouping of genotypes from the five *M. vitrata* sample sites, resulted in  $F_{ST}$  estimates that reached a significance threshold  $\geq 0.05$ .

Analyses using the program STRUCTURE revealed that population subdivision may exist, where the posterior probabilities for a value of  $K > 1$  approached a maximum of 0.3679 at  $K = 3$ . The  $\ln \text{Pr}(X|K)$  decreased drastically for  $K = 2$  ( $9.2 \times 10^{-9}$ ) and  $K = 4$  ( $4.8 \times 10^{-23}$ ). The partitioning of ancestry within individual genotypes indicated that 82.8% was contained within two clusters (cluster 1 = 21.3 ± 9.1%; cluster 2 = 61.5 ± 11.8%; Fig. 6).

**Discussion**

***Maruca vitrata* expressed sequence tags and sequence assembly**

The sequence libraries from midgut, salivary, and whole adult tissues are the first EST resources reported for *M. vitrata*, and one of a few dozen currently available from the NCBI dbEST database for species of Lepidoptera. Vera *et al.* (2008) [25] were the first to report the use of NGS technology for the rapid acquisition of transcriptome sequence data from a non-model insect species that was subsequently analyzed via functional gene annotation, gene

**Table 2.** The 15 most encountered InterPro accessions present with annotated *Maruca vitrata* EST sequences, and corresponding *B. mori* gene models with matching InterPro annotation.

| InterPro Entry | No. | IPR description(s)                            |
|----------------|-----|-----------------------------------------------|
| IPR013032      | 9   | EGF-like region, conserved site               |
| IPR007087      | 9   | Zinc finger (Znf) domain, C2H2-type           |
| IPR009003      | 8   | Peptidase, trypsin-like serine and cysteine   |
| IPR001254      | 8   | Peptidase_S1/S6, chymotrypsin-like/Hap        |
| IPR016040      | 7   | NAD- and NADP-binding domain                  |
| IPR018114      | 5   | Peptidase S1/S6, chymotrypsin/Hap active site |
| IPR017853      | 5   | Glycoside hydrolase, catalytic core           |
| IPR013781      | 5   | Glycoside hydrolase, subgroup, catalytic core |
| IPR002198      | 5   | Short-chain dehydrogenase/reductase SDR       |
| IPR002018      | 5   | Carboxyesterase, type B                       |
| IPR000215      | 5   | Protease inhibitor I4, serpin                 |
| IPR015590      | 4   | Aldehyde dehydrogenase domain                 |
| IPR012335      | 4   | Thioredoxin fold                              |
| IPR009072      | 4   | Histone-fold                                  |
| IPR008978      | 4   | Heat shock protein 20-like chaperone          |

doi:10.1371/journal.pone.0021388.t002

**Table 3.** Population statistics for African *Maruca vitrata* collection sites (Site ID correspond to those given in Fig. 1).

| Contig   |          | 1478  | 1663  | 0172   | 0172   | 0180   | 0315   | 0355   | 0702   | 0896  | 0098   | 1692   |
|----------|----------|-------|-------|--------|--------|--------|--------|--------|--------|-------|--------|--------|
| Position |          | 266   | 832   | 349    | 430    | 816    | 310    | 182    | 243    | 1927  | 663    | 590    |
| MAF      | SiteA    | 0.011 | 0.138 | 0.108  | 0.044  | 0.178  | 0.000  | 0.078  | 0.110  | 0.092 | 0.000  | 0.176  |
|          | SiteB    | 0.023 | 0.083 | 0.238  | 0.239  | 0.278  | 0.000  | 0.133  | 0.000  | 0.114 | 0.048  | 0.105  |
|          | SiteC    | 0.068 | 0.182 | 0.214  | 0.000  | 0.308  | 0.079  | 0.000  | 0.000  | 0.143 | 0.000  | 0.059  |
|          | SiteD    | 0.159 | 0.250 | 0.068  | 0.068  | 0.423  | 0.083  | 0.033  | 0.067  | 0.158 | 0.048  | 0.344  |
|          | SiteE    | 0.063 | 0.267 | 0.197  | 0.027  | 0.265  | 0.053  | 0.125  | 0.000  | 0.206 | 0.026  | 0.318  |
|          | $\mu$    | 0.065 | 0.145 | 0.165  | 0.076  | 0.290  | 0.043  | 0.074  | 0.035  | 0.143 | 0.024  | 0.200  |
|          | $\sigma$ | 0.058 | 0.077 | 0.073  | 0.095  | 0.089  | 0.041  | 0.058  | 0.051  | 0.044 | 0.024  | 0.127  |
|          | $H_E$    | 0.045 | 0.157 | 0.372  | 0.048  | 0.413  | 0.089  | 0.239  | 0.241  | 0.000 | 0.093  | 0.193  |
|          | $H_O$    | 0.045 | 0.167 | 0.286  | 0.048  | 0.556  | 0.091  | 0.133  | 0.273  | 0.000 | 0.000  | 0.105  |
|          | $F_{ST}$ | 0.026 | 0.164 | -0.009 | -0.005 | -0.007 | 0.001  | -0.017 | -0.019 | 0.018 | -0.024 | 0.107  |
|          | $F_{IS}$ | 0.298 | 0.492 | 0.130  | -0.031 | -0.277 | -0.050 | 0.555  | 0.660  | 0.075 | 0.489  | -0.009 |
|          | $F_{IT}$ | 0.329 | 0.631 | 0.126  | -0.034 | -0.268 | -0.040 | 0.553  | 0.664  | 0.102 | 0.794  | 0.100  |

The minor SNP allele frequency (MAF) is given by locus within and across all population samples. The overall North American population mean ( $\mu$ ) and variance ( $\sigma$ ) as well as observed ( $H_O$ ) and expected heterozygosity ( $H_E$ ) are given for each locus. Lastly, locus specific  $F_{ST}$ ,  $F_{IS}$ , and  $F_{IT}$  estimates among populations are given. doi:10.1371/journal.pone.0021388.t003

orthology estimation with a model species, and prediction of putative mutations. 454-based transcriptome sequencing for non-model organisms has since become more commonplace [26], but it is still fraught with errors derived from sensitivity to homopolymer stretches and from the overestimation of total gene number caused by fragmented assemblies [23,25,67]. These phenomena were also observed in our *M. vitrata* EST assemblies, where the mean contig length for the 454-based EST assembly was lower compared to that resulting from Sanger-based read data (albeit, direct comparisons are difficult since assemblies were derived from different sets of genes in different tissues). Although independent reads and mean contig lengths are shorter for 454-based assemblies, the maximum length of contigs tends to be higher than that observed for Sanger sequencing [26]. This may result from assemblies that use relaxed parameters for joining overlapping sequences wherein chimeras may be produced that are comprised of closely related paralogous [68]. Conversely, highly stringent parameters may place alleles at a locus into unique contigs. This latter strategy likely is a cause for the overestimation of total gene counts and fragmented assemblies due to an effective reduction in sequence coverage per gene, and is not ideal for SNP discovery.

### Homology, orthology, and functional gene annotation

The prediction of gene-coding sequence within EST datasets from non-model species is typically achieved via functional annotation, a process that relies upon the homology-based identification of related genes within model organisms [46,47]. Difficulties arise when a significant proportion of genes cannot be assigned functions or are given vague functions [69], which is common for other non-model species [18,19,26] and for our *M. vitrata* EST dataset. This may prove especially difficult with ESTs since individual sequences rarely encompass the entire gene, have nebulous reading frames, or are comprised mostly of non-coding regions. Furthermore, non-model species often have unique gene lineages that are not represented within the molecular databases typically used for comparative annotation. This last issue was addressed by Coates *et al* (2008) [18], where authors predicted open reading frames within un-annotated EST sequences from *Ostrinia nubilalis*. Although these *O. nubilalis* hypothetical proteins had no homologs within the NCBI protein database, similar proteins of unknown function were predicted within ESTs from related non-model species. These findings indicate that current annotation protocols are not adequately built to describe the utility of EST datasets. Given the accelerating pace of NGS data production and sequence assembly submissions to molecular databases from lesser-studied groups, researchers should focus on developing annotation resources specific to different branches of evolution.

### Single nucleotide polymorphism (SNP) prediction and assay development

Next generation sequencing (NGS) technology offers a means for researchers to rapidly acquire genomic data that have a bearing on biological questions, accelerate genetic discoveries, and develop genetic tools in non-model species. Expressed sequence tags are a rich source of mutation data from which SNPs can readily be identified [30,70]. These SNPs can be validated by several novel genotyping technologies [36,71]. The usefulness of a given EST resource for identifying SNP loci *in silico* depends upon the assembly depth and the diversity of tissues and individuals sampled within the library [72,73]. Additionally, SNPs can be

**Table 4.** Pairwise  $F_{ST}$  estimates (below diagonal) and corresponding  $P$ -values (above diagonal).

| Site ID | SiteA   | SiteB   | SiteC  | SiteD   | SiteE   |
|---------|---------|---------|--------|---------|---------|
| SiteA   | -       | 0.6577  | 0.6036 | 0.0090* | 0.0451* |
| SiteB   | -0.0102 | -       | 0.9369 | 0.0180* | 0.0812  |
| SiteC   | -0.0074 | -0.0192 | -      | 0.1081  | 0.0180* |
| SiteD   | 0.0482  | 0.0524  | 0.0416 | -       | 0.3694  |
| SiteE   | 0.0161  | 0.0291  | 0.0350 | 0.0009  | -       |

Comparisons surpassing a significance threshold of  $\alpha = 0.05$  (\*) and a Bonferroni adjusted  $\alpha = 0.005$  (\*\*) are indicated. Site ID correspond to those given in Fig. 1). doi:10.1371/journal.pone.0021388.t004



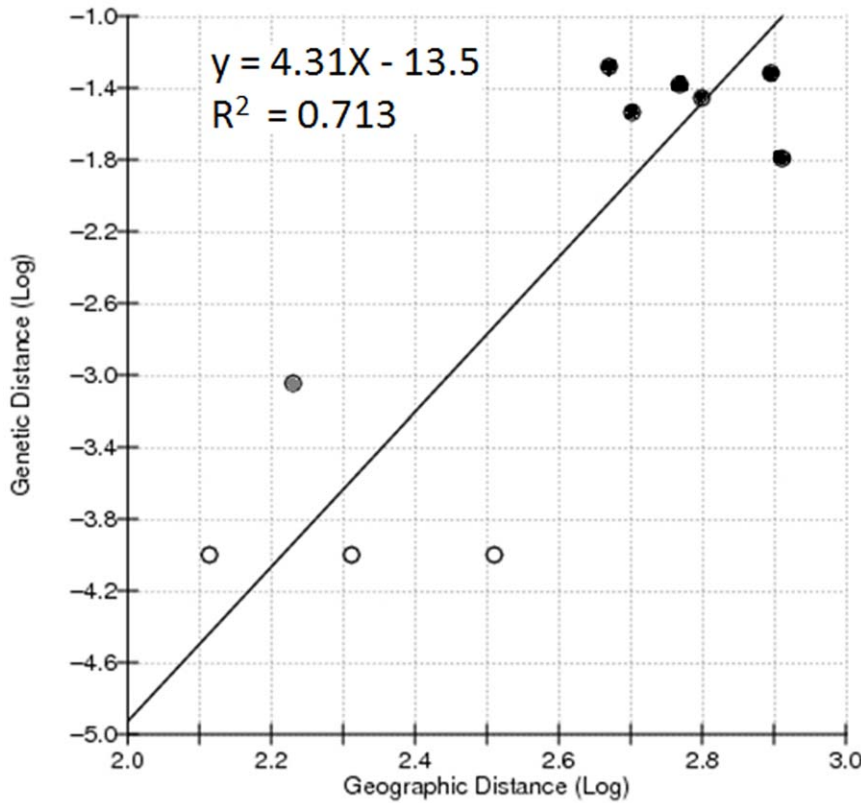

**Figure 5. Genetic isolation-by-distance analysis by regression of  $\text{Log}_{10}(F_{ST})$  and  $\text{Log}_{10}(\text{geographic distance, km})$ .** Comparisons among Burkina Faso (Sites A, B, and C) are represented as open dots (○), between Burkina Faso and Niger (Site D) or Nigeria (Site E) closed dots (●), and are between Niger and Nigeria (grey dot). doi:10.1371/journal.pone.0021388.g005

predicted from pools of closely related species, from which shared ancestral and uniquely derived mutations within lineages can be identified [74]. Earlier studies have described the development of SNP markers from NGS data and their subsequent application for individual genotyping [75,76,77], but few have been described for species of Lepidoptera [18].

Molecular genetic markers based upon microsatellite variation among alleles have been used to estimate population genetic parameters, Notable exceptions include crustaceans [78], mollusks [79] and lepidopterans [80]. Microsatellite loci in lepidopteran genomes have been described as either hitchhiking within transposons [42,44], as sites for the integration of transposable elements [45], or being the consequence of target site duplication

by retrotransposons [80]. A number of variables can prevent the validation of putative SNPs. When a SNP is predicted within an EST assembly from species that lacks a whole genome assembly, unknown intron positions and sequence similarity among paralogous genes may lead to failure of PCR amplification and a lack of locus specificity. Despite these inherent difficulties the rate of validation at putative SNP loci ranges from 29 to 50% [80,81], where the contributing factor to marker failure is in the generation of consistent nucleotide calls and presence of monomorphic loci [82]. The 50% rate of validation for putative *M. vitrata* SNPs was typical of that observed for other non-model species, and provided a pool of marker genetic markers that were subsequently used to genotype individuals from 5 collections sites in West Africa.

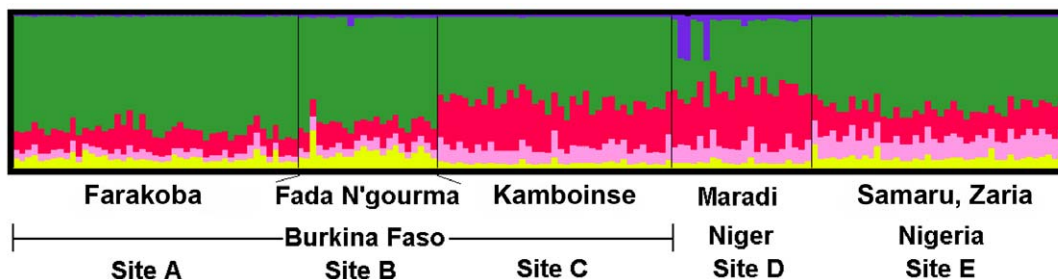

**Figure 6. The estimated ancestry coefficients ( $Q$ ) for *Maruca vitrata* individuals from STRUCTURE output generated by the LOCPRIOR command.** The ancestry of individual SNP genotypes from sampled subpopulations. Each of the *M. vitrata* individuals are represented as vertical lines, and are composed of the proportion of the  $k^{\text{th}}$  segment that representative of the ancestry in the respective genotype. doi:10.1371/journal.pone.0021388.g006

## SNP genotyping and population genetic analyses

SNPs have been used to generate genetic linkage maps of the model lepidopteran species, *Bombyx mori* [82], and the butterfly *Bicyclus anynana* [83], but the utility of SNPs for population genetic inference within a species of Lepidoptera has not yet been proven [18]. Lack of genetic and genomic resources for insect pest species has hindered efforts to control pests and determine their movement within populations. These are processes essential for the development of resistance management strategies. Genetic markers have been developed from putative SNPs identified from sequence datasets of the crop pest species *Aphis glycines* [84]. Similar markers were used to genotype *O. nubilalis* populations where additional criteria, including adherence to Hardy-Weinberg Equilibrium (HWE), were applied during validation [18]. In total, 24 of 41 *M. vitrata* SNP markers (58.5%) deviated significantly from HWE expectations; with an excess of observed homozygosity being a potential source of the skew. The proportion of *M. vitrata* SNP markers that deviated significantly from HWE was higher than that reported for *O. nubilalis* [18], and may be caused by inbreeding, assortative mating, the Wahlund effect, or selection. A reduction in overall heterozygosity due to the Wahlund effect may be a likely cause since *M. vitrata* is a migratory species that moves northward into sub-Saharan regions from coastal regions during the rainy season, with no evidence of reverse migration. This seasonal movement may result in the temporal admixture, and be a potential explanation for the observed reduction in estimated heterozygosity frequency of *M. vitrata* sampled from West Africa, but additional and more detailed studies are required in order to draw any additional conclusions.

*Maruca vitrata* is the major insect pest of cowpea in West Africa [85]. In this region insecticides and sprayers are often prohibitively expensive or otherwise unavailable to low-income farmers in West Africa [86]. The analyses of *M. vitrata* SNP markers suggested that genetic structuring may occur within West Africa. Specifically, the pairwise  $F_{ST}$  estimates show that significant levels of differentiation were present between eastern and western sample sites, whereas all other comparisons indicated a lack of genetic divergence. Additionally, a positive correlation between pairwise  $F_{ST}$  estimates (used as a genetic distance estimate) and linear geographic distances suggests that the *M. vitrata* population may show genetic isolation by distance. Although this distance model was not fully supported by the estimation of co-ancestry contained within individual genotypes, STRUCTURE results did indicate that two divergent genotypes exist within West Africa. Understanding *M. vitrata* population dynamics and migratory patterns has important implications for resistance management plans for *Bt* cowpea and for the deployment of biocontrol agents in endemic zones. These tactics may help increase local food production in West Africa, reduce malnutrition, and stabilize grain commodity prices. Gene flow barriers and significant levels of genetic differentiation within a target pest populations influence that scale of insect resistance

management practices typically implemented to maintain susceptibility and preserve the efficacy of pest management tools such as *Bt* crops and lay the foundation for cost effective bio-control agent release programs. For example, as these data are in keeping with an endemic zone to migratory zone hypothesis, the deployment of biocontrol agents (for classical biological control) would be most logical in the endemic zone directly south of migratory regions where *M. vitrata* is a significant pest during the cowpea growing season. Moreover, these results demonstrate that putative SNP data predicted within transcriptome sequence assemblies can be used to develop molecular genetic markers for the evaluation of real-world populations and the collection of data relevant to insect control.

## Supporting Information

**Data S1** Prediction of putative gene orthology between the gene sequences within the *Maruca vitrata* combined EST assembly (i.e. reference assembly) and translated products from the GLEAN predicted *Bombyx mori* gene model v. 2.3. (DOC)

**Data S2** Derived amino acid sequence of *Maruca vitrata* EST contigs assigned putative functional annotation as alanine aminopeptidase (APN) encoding gene sequences. (DOC)

**Data S3** CLUSTAL 2.0.12 multiple sequence alignments of derived *Maruca vitrata* alanine aminopeptidase (APN) amino acid sequences with nine *Bombyx mori* APNs from the GLEAN-predicted gene model v. 2.3. (DOC)

**Data S4** Oligonucleotide primers used in *Maruca vitrata* PCR multiplex W1. (DOC)

**Data S5** Exact test to determine the adherence of *Maruca vitrata* single nucleotide polymorphism (SNP) markers to Hardy-Weinberg Equilibrium (HWE) proportions within natural populations collected from Africa. Markov chain (for all loci) used a forecasted chain length of 1,000,000 and dememorization steps of 100,000. P-values that surpassed a significance threshold of  $\alpha = 0.05$  are indicated with an asterisk (\*). (DOC)

## Author Contributions

Conceived and designed the experiments: VMM BSC WS BRP. Performed the experiments: VMM BSC WS MNB TA. Analyzed the data: VMM BSC DOB JAK. Contributed reagents/materials/analysis tools: VMM RLH BSC DOB MNB CLB-D IB MFI FGC RS JA LLM BRP. Wrote the paper: VMM BSC TA JAK MJJS LLM BRP.

## References

- Atachi P, Djihou ZC (1994) Record of Host-Plants of *Maruca testulalis* (Geyer) (Lepidoptera, Pyralidae) in Republic-of-Benin. *Annales De La Societe Entomologique De France* 30: 169–174.
- Raheja AI (1974) Report on the insect pests of grain legumes in northern Nigeria. 1st IITA Grain Legume Improvement Workshop (1973); International Institute of Tropical Agriculture, Ibadan, Nigeria. pp 295–299.
- Taylor TA (1967) The bionomics of *Maruca testulalis* Gey. (Lepidoptera: Pyralidae), a major pest of cowpeas in Nigeria. *J of West African Scient Assoc* 12: 111–129.
- Chinh NT, Dzung DT, Long TD, Tam HM, Ramakrishna A, et al. (2000) Legumes in Viet Nam: Constraints and Opportunities. 111–125. In: (Eds.), In: Gowda CLL, Ramakrishna A, Rupela OP, Wani SP, eds. Legumes in rice-based cropping systems in tropical Asia: Constraints and Opportunities. Hyderabad, India: ICRISAT. pp 111–125.
- Soeun M (2001) Legumes in rice-based cropping systems in Cambodia: Constraints and opportunities. In: Gowda CLL, Ramakrishna A, Rupela OP, Wani SP, eds. Legumes in rice-based cropping systems in tropical Asia: Constraints and Opportunities ICRISAT, India. pp 4–10.
- Ulrichs C, Mewis I, Schnitzler WH, Burleigh JR (2001) Parasitoids of the bean podborer, *Maruca vitrata* F. (Lepidoptera:Pyraustinae), a pest of *Vigna sesquipedalis* in the Philippine lowlands. *Mitteilungen der Deutschen Gesellschaft für allgemeine und angewandte Entomologie* 13: 283–288.
- Bindra OS (1968) A note on the study of varietal resistance in pulses to different insect pests. In " Indian Agricultural Research Institute, New Delhi. Second

- Annual Workshop on Pulse Crops. New Delhi: Indian Agricultural Research Institute.
8. Patnaik HP, Samolo AP, Samolo BN (1986) Susceptibility of some early varieties of pigeonpea for pod borers under protected conditions. *Legume Research* 9: 7–10.
  9. Rahman MM (1989) Pest complex of flower and pods of pigeonpea and their control through insecticide application Bangladesh. *Journal of Scientific Research* 7: 27–32.
  10. Sharma HC (1998) Bionomics, host plant resistance, and management of the legume pod borer, *Maruca vitrata* - a review. *Crop Protection* 17: 373–386.
  11. Chen S, Ravallion M (2004) How have the world's poorest fared since the early 1980s? *World Bank Research Observer* 19: 141–169.
  12. Kym A (2006) Transgenic crops, EU precaution, and developing countries. *International Journal of Technology and Globalisation* 2: 65–80.
  13. Oparake AM (2006) The potential for controlling *Maruca vitrata* Fab. and *Clavigralla tomentosicollis* Stal. using different concentrations and spraying schedules of *Syzgium aromaticum* (L.) Merr and Perr on cowpea plants. *Journal of Plant Sciences* 1: 132–137.
  14. Adams MD, Kelley JM, Gocayne JD, Dubnick M, Polymeropoulos MH, et al. (1991) Complementary DNA sequencing: expressed sequence tags and human genome project. *Science* 252: 1651–1656.
  15. McCombie WR, Adams MD, Kelley JM, FitzGerald MG, Utterback TR, et al. (1992) *Caenorhabditis elegans* expressed sequence tags identify gene families and potential disease gene homologues. *Nat Genet* 1: 124–131.
  16. Nagaraj SH, Gasser RB, Ranganathan S (2007) A hitchhiker's guide to expressed sequence tag (EST) analysis. *Brief Bioinform* 8: 6–21.
  17. Noda H, Kawai S, Koizumi Y, Matsui K, Zhang Q, et al. (2008) Annotated ESTs from various tissues of the brown planthopper *Nilaparvata lugens*: a genomic resource for studying agricultural pests. *BMC Genomics* 9: 117.
  18. Coates BS, Sumerford DV, Hellmich RL, Lewis LC (2008) Mining an *Ostrinia nubilalis* midgut expressed sequence tag (EST) library for candidate genes and single nucleotide polymorphisms (SNPs). *Insect Mol Biol* 17: 607–620.
  19. Khajuria C, Zhu YC, Chen MS, Buschman LL, Higgins RA, et al. (2009) Expressed sequence tags from larval gut of the European corn borer (*Ostrinia nubilalis*): exploring candidate genes potentially involved in *Bacillus thuringiensis* toxicity and resistance. *BMC Genomics* 10: 286.
  20. Siegfried BD, Waterfield N, French-Constant RH (2005) Expressed sequence tags from *Diabrotica virgifera virgifera* midgut identify a coleopteran cadherin and a diversity of cathepsins. *Insect Mol Biol* 14: 137–143.
  21. Ronaghi M (2001) Pyrosequencing sheds light on DNA sequencing. *Genome Res* 11: 3–11.
  22. Ronaghi M, Uhlen M, Nyren P (1998) A sequencing method based on real-time pyrophosphate. *Science* 281: 363, 365.
  23. Margulies M, Egholm M, Altman WE, Attiya S, Bader JS, et al. (2005) Genome sequencing in microfabricated high-density picolitre reactors. *Nature* 437: 376–380.
  24. Bennett S (2004) Solexa Ltd. *Pharmacogenomics* 5: 433–438.
  25. Vera JC, Wheat CW, Fescemeyer HW, Frilander MJ, Crawford DL, et al. (2008) Rapid transcriptome characterization for a nonmodel organism using 454 pyrosequencing. *Mol Ecol* 17: 1636–1647.
  26. Pauchet Y, Wilkinson P, Vogel H, Nelson DR, Reynolds SE, et al. (2010) Pyrosequencing the *Manduca sexta* larval midgut transcriptome: messages for digestion, detoxification and defence. *Insect Mol Biol* 19: 61–75.
  27. Heidel-Fischer HM, Freitak D, Janz N, Soderlind L, Vogel H, et al. (2009) Phylogenetic relatedness and host plant growth form influence gene expression of the polyphagous comma butterfly (*Polygona c-album*). *BMC Genomics* 10: 506.
  28. Wang P, Granados RR (1997) An intestinal mucin is the target substrate for a baculovirus enhancer. *Proceedings of the National Academy of Sciences USA* 94: 6977–6982.
  29. Keane OM, Macqbool N, McCulloch AF, McEwan JC, Dodds KG (2009) Generation of a preliminary bovine gene atlas, using expression clustering to annotate gene function. *Genet Mol Res* 8: 1013–1027.
  30. Hayes BJ, Nilsen K, Berg PR, Grindflek E, Lien S (2007) SNP detection exploiting multiple sources of redundancy in large EST collections improves validation rates. *Bioinformatics* 23: 1692–1693.
  31. Huntley D, Baldo A, Johri S, Sergot M (2006) SEAN: SNP prediction and display program utilizing EST sequence clusters. *Bioinformatics* 22: 495–496.
  32. Pavy N, Parsons LS, Paule C, MacKay J, Bousquet J (2006) Automated SNP detection from a large collection of white spruce expressed sequences: contributing factors and approaches for the categorization of SNPs. *BMC Genomics* 7: 174.
  33. Useche FJ, Gao G, Harafey M, Rafalski A (2001) High-throughput identification, database storage and analysis of SNPs in EST sequences. *Genome Inform* 12: 194–203.
  34. Xing C, Schumacher FR, Xing G, Lu Q, Wang T, et al. (2005) Comparison of microsatellites, single-nucleotide polymorphisms (SNPs) and composite markers derived from SNPs in linkage analysis. *BMC Genet* 6 Suppl 1: S29.
  35. Kennedy GC, Matsuzaki H, Dong S, Liu WM, Huang J, et al. (2003) Large-scale genotyping of complex DNA. *Nat Biotechnol* 21: 1233–1237.
  36. Vignal A, Milan D, SanCristobal M, Eggen A (2002) A review on SNP and other types of molecular markers and their use in animal genetics. *Genet Sel Evol* 34: 275–305.
  37. Williams LM, Ma X, Boyko AR, Bustamante CD, Oleksiak MF (2010) SNP identification, verification, and utility for population genetics in a non-model genus. *BMC Genet* 11: 32.
  38. Beldade P, Saenko SV, Pul N, Long AD (2009) A gene-based linkage map for *Bicyclus anynana* butterflies allows for a comprehensive analysis of synteny with the lepidopteran reference genome. *PLoS Genet* 5: e1000366.
  39. Meglec E, Petenian F, Danchin E, D'Acier AC, Rasplus JY, et al. (2004) High similarity between flanking regions of different microsatellites detected within each of two species of Lepidoptera: *Parnassius apollo* and *Euphydryas aurinia*. *Mol Ecol* 13: 1693–1700.
  40. Van't Hof AE, Brakefield PM, Saccheri IJ, Zwaan BJ (2007) Evolutionary dynamics of multilocus microsatellite arrangements in the genome of the butterfly *Bicyclus anynana*, with implications for other Lepidoptera. *Heredity* 98: 320–328.
  41. Zhang DX (2004) Lepidopteran microsatellite DNA: redundant but promising. *Trends Ecol Evol* 19: 507–509.
  42. Coates BS, Sumerford DV, Hellmich RL, Lewis LC (2009) Repetitive genome elements in a European corn borer, *Ostrinia nubilalis*, bacterial artificial chromosome library were indicated by bacterial artificial chromosome end sequencing and development of sequence tag site markers: implications for lepidopteran genomic research. *Genome* 52: 57–67.
  43. Tay WT, Behere GT, Batterham P, Heckel DG (2010) Generation of microsatellite repeat families by RTE retrotransposons in lepidopteran genomes. *BMC Evol Biol* 10: 144.
  44. Coates BS, Kroemer JA, Sumerford DV, Hellmich RL (2011) A novel class of miniature inverted repeat transposable elements (MITEs) that contain hitchhiking (GTCY)<sub>n</sub> microsatellites. *Insect Mol Biol* 20: 15–27.
  45. Coates BS, Sumerford DV, Hellmich RL, Lewis LC (2010) A helitron-like transposon superfamily from lepidoptera disrupts (GAAA)<sub>n</sub> microsatellites and is responsible for flanking sequence similarity within a microsatellite family. *J Mol Evol* 70: 275–288.
  46. Conesa A, Gotz S, Garcia-Gomez JM, Terol J, Talon M, et al. (2005) Blast2GO: a universal tool for annotation, visualization and analysis in functional genomics research. *Bioinformatics* 21: 3674–3676.
  47. Gotz S, Garcia-Gomez JM, Terol J, Williams TD, Nagaraj SH, et al. (2008) High-throughput functional annotation and data mining with the Blast2GO suite. *Nucleic Acids Res* 36: 3420–3435.
  48. Altschul SF, Madden TL, Schäffer AA, Zhang J, Zhang Z, et al. (1997) Gapped BLAST and PSI-BLAST: a new generation of protein database search programs. *Nucleic Acids Res* 25: 3389–3402.
  49. Hunter S, Apweiler R, Attwood TK, Bairoch A, Bateman A, et al. (2009) InterPro: the integrative protein signature database. *Nucleic Acids Res* 37: D211–215.
  50. Quevillon E, Silventoinen V, Pillai S, Harte N, Mulder N, et al. (2005) InterProScan: protein domains identifier. *Nucleic Acids Res* 33: W116–120.
  51. Kanehisa M, Goto S (2000) KEGG: kyoto encyclopedia of genes and genomes. *Nucleic Acids Res* 28: 27–30.
  52. Hall TA (1999) BioEdit: a user-friendly biological sequence alignment editor and analysis program for Windows 95/98/NT. *Nucleic Acids Symposium Series* 41: 95–98.
  53. Wernersson R (2006) Virtual Ribosome—a comprehensive DNA translation tool with support for integration of sequence feature annotation. *Nucleic Acids Res* 34: W385–388.
  54. Tamura K, Peterson D, Peterson N, Stecher G, Nei M, Kumar S (2011) MEGA5: Molecular Evolutionary Genetics Analysis using Maximum Likelihood, Evolutionary Distance, and Maximum Parsimony Methods. *Mol Biol and Evol*, In press.
  55. Saitou N, Nei M (1987) The neighbor-joining method: a new method for reconstructing phylogenetic trees. *Mol Biol Evol* 4: 406–425.
  56. Ota T, Nei M (1994) Estimation of the number of amino acid substitutions per site when the substitution rate varies among sites. *Journal of Molecular Evolution* 38: 642–643.
  57. Felsenstein J (1985) CONFIDENCE-LIMITS ON PHYLOGENIES - AN APPROACH USING THE BOOTSTRAP. *Evolution* 39: 783–791.
  58. Tang K, Fu DJ, Julien D, Braun A, Cantor CR, Koster H (1999) Chip-based genotyping by mass spectrometry. *Proc Natl Acad Sci USA* 96: 10016–10020.
  59. Gabriel S, Ziaugra L, Tabbai D (2009) SNP genotyping using the Sequenom MassARRAY iPLEX platform. *Curr Protoc Hum Genet* Chapter 2: Unit 12.12.
  60. Excoffier L, Laval G, Schneider S (2005) Arlequin (version 3.0): an integrated software package for population genetics data analysis. *Evol Bioinform Online* 1: 47–50.
  61. Cockerham CC, Weir BS (1984) Covariances of relatives stemming from a population undergoing mixed self and random mating. *Biometrics* 40: 157–164.
  62. Excoffier L, Smouse PE, Quattro JM (1992) Analysis of molecular variance inferred from metric distances among DNA haplotypes: application to human mitochondrial DNA restriction data. *Genetics* 131: 479–491.
  63. Weir BS (1992) Independence of VNTR alleles defined as fixed bins. *Genetics* 130: 873–887.
  64. Jensen JL, Bohonak AJ, Kelley ST (2005) Isolation by distance, web service. *BMC Genet* 6: 13.
  65. Falush D, Stephens M, Pritchard JK (2007) Inference of population structure using multilocus genotype data: dominant markers and null alleles. *Mol Ecol Notes* 7: 574–578.

66. Hubisz MJ, Falush D, Stephens M, Pritchard JK (2009) Inferring weak population structure with the assistance of sampling group information. *Molecular Ecology Resources* 9: 1322–1332.
67. Chaisson MJ, Brinza D, Pevzner PA (2009) De novo fragment assembly with short mate-paired reads: Does the read length matter? *Genome Research*. pp 336–346.
68. Heber S, Alekseyev M, Sze SH, Tang H, Pevzner PA (2002) Splicing graphs and EST assembly problem. *Bioinformatics* 18 Suppl 1: S181–188.
69. Hoskeri H, Krishna V, Amruthavalli C (2010) Functional annotation of conserved hypothetical proteins in *Rickettsia massiliensis* MTU5. *Journal of Comparative Science and Systematic Biology* 3: 5052.
70. Barbazuk WB, Emrich SJ, Chen HD, Li L, Schnable PS (2007) SNP discovery via 454 transcriptome sequencing. *Plant J* 51: 910–918.
71. Sobrino B, Brion M, Carracedo A (2005) SNPs in forensic genetics: a review on SNP typing methodologies. *Forensic Sci Int* 154: 181–194.
72. Picoult-Newberg L, Ideker TE, Pohl MG, Taylor SL, Donaldson MA, et al. (1999) Mining SNPs from EST databases. *Genome Res* 9: 167–174.
73. Rafalski A (2002) Applications of single nucleotide polymorphisms in crop genetics. *Curr Opin Plant Biol* 5: 94–100.
74. Wang S, Peatman E, Abernathy J, Waldbieser G, Lindquist E, et al. (2010) Assembly of 500,000 inter-specific catfish expressed sequence tags and large scale gene-associated marker development for whole genome association studies. *Genome Biol* 11: R8.
75. Novaes E, Drost DR, Farmerie WG, Pappas GJ, Grattapaglia D, Sederoff RR, Kirst M (2008) High-throughput gene and SNP discovery in *Eucalyptus grandis*, an uncharacterized genome. *BMC Genomics* 9: 312.
76. Wiedmann RT, Smith TPL, Nonneman DJ (2008) SNP discovery in swine by reduced representation and high throughput pyrosequencing. *BMC Genomics* 9: 81.
77. Williams LM, Ma X, Boyko AR, Bustamante CD, Oleksiak MF (2010) SNP identification, verification, and utility for population genetics in a non-model species. *BMC Genomics* 11: 32.
78. Bailie DA, Fletcher H, Prodohl PA (2010) High incidence of cryptic repeated elements in microsatellite flanking regions of Galatheid genomes and its practical implications for molecular marker development. *J Crustacean Biol* 30: 664–672.
79. McInerney CE, Allock AL, Johnson MP, Bailie DA, Prodohl PA (2011) Comparative genomic analysis reveals species-dependent complexities that explain difficulties with microsatellite marker development in molluscs. *Heredity* 106: 78–87.
80. Tay WT, Behere GT, Batterhan P, Heckel DG (2010) Generation of microsatellite repeat families by RTE transposons in lepidopteran genomes. *BMC Evol Biol* 10: 144.
81. Hawken RJ, Barris WC, McWilliam SM, Dalrymple BP (2004) An interactive bovine *in silico* SNP database (IBISS). *Mamm Genome* 15: 819–827.
82. Yamamoto K, Narukawa J, Kadono-Okuda K, Nohata J, Sasanuma M, et al. (2006) Construction of a single nucleotide polymorphism linkage map for the silkworm, *Bombyx mori*, based on bacterial artificial chromosome end sequences. *Genetics* 173: 151–161.
83. Beldade P, Saenko SV, Pul N, Long AD (2010) A gene-based linkage map of *Bicyclus anynana* butterflies allows for a comprehensive analysis of synteny with the lepidopteran reference genome. *PLoS Genet* 5: e1000366.
84. Bai X, Zhang W, Orantes L, Jun TH, Mittapalli O, et al. (2010) Combining next-generation sequencing strategies for rapid molecular resource development from an invasive aphid species, *Aphis glycines*. *PLoS One* 5: e11370.
85. Jackai LEN, Singh SR (1988) Screening techniques for host plant resistance to insect pests of cowpea. *Tropical Grain Legume Bulletin* 35: 2–18.
86. Alghali AM (1991) Studies on cowpea farming practices in Nigeria with emphasis on insect's pest control. *Trop Pest Manage* 37: 71–74.
